# Supplementary material for: Evolutionary Analysis of the Steroidogenic Acute Regulatory Protein-Related Lipid Transfer Domain and Its Response to Salt Stress In Vitis Vinifera
Source: Research Square preprint supplement (doi:10.21203/rs.3.rs-399598/v2), 2022-03-28
Supplement: Supplementary file 2 [file 8990872b5d422fee7dd5e316.docx]

Table S6. Data of the secondary structure of VvSTARD protein sequences in grapes

| protein | Alpha helix (%) | Beta turn (%) | Random coil (%) |
| --- | --- | --- | --- |
| VvSTARD1 | 34.17 | 4.01 | 48.44 |
| VvSTARD2 | 35.43 | 4.48 | 44.26 |
| VvSTARD3 | 35.47 | 3.33 | 46.67 |
| VvSTARD4 | 35.81 | 3.99 | 45.32 |
| VvSTARD5 | 35.01 | 4.62 | 45.84 |
| VvSTARD6 | 31.52 | 4.15 | 48.38 |
| VvSTARD7 | 37.47 | 4.97 | 41.65 |
| VvSTARD8 | 33.53 | 4.30 | 46.14 |
| VvSTARD9 | 43.38 | 4.77 | 38.02 |
| VvSTARD10 | 41.11 | 3.91 | 41.71 |
| VvSTARD11 | 41.08 | 5.03 | 40.60 |
| VvSTARD12 | 41.42 | 4.85 | 39.53 |
| VvSTARD13 | 44.11 | 4.52 | 37.93 |
| VvSTARD14 | 31.61 | 5.59 | 45.10 |
| VvSTARD15 | 31.87 | 5.36 | 45.05 |
| VvSTARD16 | 31.27 | 3.24 | 48.73 |
| VvSTARD17 | 30.52 | 4.50 | 49.05 |
| VvSTARD18 | 33.46 | 5.25 | 43.31 |
| VvSTARD19 | 38.53 | 5.77 | 35.41 |
| VvSTARD20 | 31.51 | 6.51 | 47.92 |
| VvSTARD21 | 32.43 | 5.69 | 44.31 |
| VvSTARD22 | 37.75 | 5.63 | 41.41 |
| VvSTARD23 | 37.97 | 6.75 | 32.91 |
