# Supplementary material for: Evolutionary Analysis of the Steroidogenic Acute Regulatory Protein-Related Lipid Transfer Domain and Its Response to Salt Stress In Vitis Vinifera
Source: Research Square preprint supplement (doi:10.21203/rs.3.rs-399598/v2), 2022-03-28
Supplement: Supplementary file 3 [file 9d1693fd5902277d911c05f2.docx]

**Attachment information of Fig.6SE:**

35S: *STARD5*: FLAG The sequence of primers detected by ‘Micro Tom’ tomato is as follows: the length of the amplified fragment is 365 bp, Tm=56 ℃

35S-F：TGACGCACAATCCCACTATC

*STARD5*-R：CGATGGTAGCGCTTCTTCTT

35S: *STARD5*: FLAG Detect the target fragment sequence：

TGACGCACAATCCCACTATCCTTCGCAAGACCCTTCCTCTATATAAGGAAGTTCATTTCATTTGGAGAGGACACGCTCGAGATGCCGGCAGGAATTATGATTCCGGCGACCCATATGCCGTCAATGATGGGAAGAAATGGGAATGTTGCTGCTTATGGATCTTCCTCAGGACTCAGTCTTGGCCAGCCAAATATGATGGACGGCCAGCTTCACCCACTCGACATGACTCAAAACACATCGGAAAGTGAAATCGCCAGGCTCAGAGAGGATGATTTTGACAGCAAATCTGGCAGTGAAAACCATGAAGGTGCCTCCGGAGATGACCAAGATCCCAACCAACGCCCCAAGAAGAAGCGCTACCATCG

| Component | Volume |
| --- | --- |
| Unpurified Lysate | Variable (≤4 μl) |
| Forword Primer(10μM) | 1μl |
| Reverse Primer(10μM) | 1μl |
| 2×TransDirect PCR SuperMix(+dye) | 10μl |
| ddH2O | 4μl |
| Total volume | 20μl |
